# Supplementary material for: C2 Symmetrical double chromophores: cooperativity effects in lanthanide ion complexationElectronic supplementary information (ESI) available: chemical shifts for diastereoisomeric pairs 4/5 in C6D6 solutions (300 MHz). See http://www.rsc.org/suppdata/ob/b4/b403494e/
Source: Royal Society of Chemistry journal article supplement (doi:10.1039/b403494e), 2004-01-01
Supplement: b403494e.doc [file b403494e.doc]

Supplementary Information Available

*C*2 Symmetrical Double Chromophores: Cooperativity Effects in Lanthanide Ion Complexation

Dario Pasini,a* Pier Paolo Righetti,a* Michele Zemab

a) Department of Organic Chemistry, University of Pavia, Viale Taramelli, 10 – 27100 Pavia – Italy.

b) Department of Earth Sciences, University of Pavia, Via Ferrata 1, 27100 Pavia, Italy.

**Table S1.** Chemical shifts for diastereoisomeric pairs **4/5** in C6D6 solutions (300 MHz).[a]

| Entry | Compound | **Ha** | Ha' | **Hb** |
| --- | --- | --- | --- | --- |
| 1 | **4a** | 4.315 | 4.54 | 8.195 |
| 2 | **5a** | 4.24 | 4.56 | 8.20 |
| 3 | **4b** | 4.31 | 4.67 | 8.156 |
| 4 | **5b** | 4.39 | 4.60 | 8.145 |
| 5 | **4c** | 4.35b | 4.66b | 8.153 |
| 6 | **5c** | 4.35b | 4.66b | 8.146 |

[a] The residual solvent signal was used as a lock at 7.26 ppm. [b] Signals in the diastereoisomeric mixture were undistinguishable for Ha and Ha' proton resonances.
